# Supplementary material for: Controlled Release of 18-β-Glycyrrhetinic Acid from Core-Shell Nanoparticles: Effects on Cytotoxicity and Intracellular Concentration in HepG2 Cell Line
Source: MDPI journal article supplement (doi:10.3390/ma14143893), 2021-07-12
Supplement: s1 [file s1]

Supplementary materials

# Controlled Release of 18- $\beta$ -Glycyrrhetic Acid from Core-Shell Nanoparticles: Effects on Cytotoxicity and Intracellular Concentration in HepG2 Cell Line

Giuseppina Nocca <sup>1,2,\*</sup>, Giuseppe D'Avenio <sup>3,†</sup>, Adriana Amalfitano <sup>1</sup>, Laura Chronopoulou <sup>4,\*</sup>, Alvaro Mordente <sup>1,2</sup>, Cleofe Palocci <sup>4,5,†</sup> and Mauro Grigioni <sup>3,†</sup>

<sup>1</sup> Dipartimento di Scienze biotecnologiche di base, Cliniche Intensivologiche e Perioperatorie, Università Cattolica del Sacro Cuore, 00168 Rome, Italy; adriana.amalfitano@unicatt.it (A.A.); alvaro.mordente@unicatt.it (A.M.)

<sup>2</sup> Fondazione Policlinico Universitario A. Gemelli, IRCCS, 00168 Rome, Italy

<sup>3</sup> National Center for Innovative Technologies in Public Health, Istituto Superiore di Sanità, 00161 Rome, Italy; giuseppe.davenio@iss.it (G.D.); mauro.grigioni@iss.it (M.G.)

<sup>4</sup> Department of Chemistry, University La Sapienza, 00185 Rome, Italy; cleofe.palocci@uniroma1.it

<sup>5</sup> CIABC-Centro di Ricerca per le Scienze Applicate alla Protezione dell'Ambiente e dei Beni Culturali, University La Sapienza, 00185 Rome, Italy

\* Correspondence: giuseppina.nocca@unicatt.it (G.N.); laura.chronopoulou@uniroma1.it (L.C); Tel.: +39-06-3015-4215 (G.N.); Tel.: +39-06-4991-3340 (L.C.)

† These authors contributed equally.

**Citation:** Nocca, G.; D'Avenio, G.; Amalfitano, A.; Chronopoulou, L.; Mordente, A.; Palocci, C.; Grigioni, M. Controlled Release of 18- $\beta$ -Glycyrrhetic Acid from Core-Shell Nanoparticles: Effects on Cytotoxicity and Intracellular Concentration in HepG2 Cell Line. *Materials* **2021**, *14*, 3893. <https://doi.org/10.3390/ma14143893>

Academic Editor: Katarzyna Winnicka

Received: 11 June 2021

Accepted: 07 July 2021

Published: 12 July 2021

**Publisher's Note:** MDPI stays neutral with regard to jurisdictional claims in published maps and institutional affiliations.

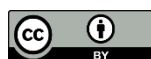

**Copyright:** © 2021 by the authors. Submitted for possible open access publication under the terms and conditions of the Creative Commons Attribution (CC BY) license (<http://creativecommons.org/licenses/by/4.0/>).

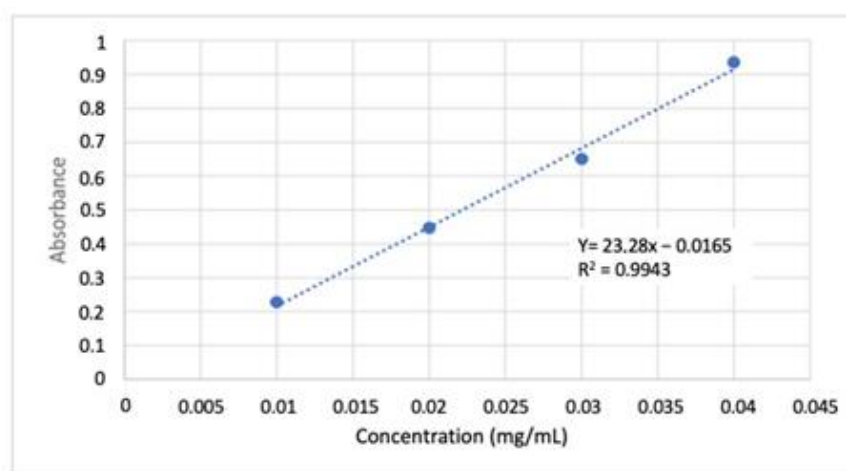

**Figure S1.** GA Calibration curve in chloroform, obtained using a spectrophotometric method at  $\lambda = 247$  nm.

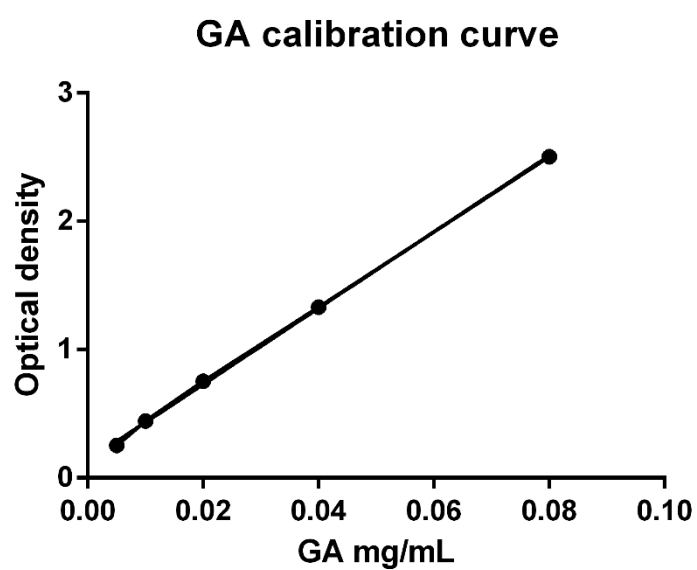

Figure S2. . GA calibration curve in PBS utilized to verify the solubility of GA.

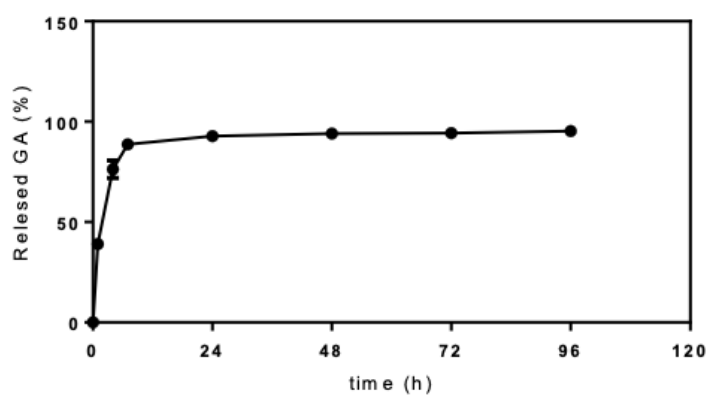

Figure S3. . GA release from GA-NPs in ethanol.
